# Supplementary material for: Tailored SERS substrates obtained with cathodic arc plasma ion implantation of gold nanoparticles into a polymer matrix
Source: Royal Society of Chemistry journal article supplement (doi:10.1039/c2cp23287a), 2011-12-13
Supplement: c2cp23287a.pdf [file c2cp23287a.pdf]

Supplementary information for

## Tailored SERS substrates obtained with cathodic arc plasma ion implantation of gold nanoparticles into a polymer matrix

Jacqueline Ferreira,<sup>a,b</sup> Fernanda S. Teixeira<sup>c</sup> Antonio R. Zanatta,<sup>b</sup> Maria C. Salvadori,<sup>c</sup> Reuven Gordon,<sup>d</sup> and Osvaldo N. Oliveira Jr.<sup>\*b</sup>

<sup>10</sup> <sup>a</sup> Centro de Ciências Químicas, Farmacêuticas e de Alimentos, Universidade Federal de Pelotas, Rio Grande do Sul, 96010-900, P.O. Box 354, Pelotas, RS, Brazil. Fax: 53 3275 7533; Tel: 53 3275 7533; E-mail: jacqueline.research@gmail.com

<sup>15</sup> <sup>b</sup> Instituto de Física de São Carlos, Universidade de São Paulo, CP 369, 13566-590, São Carlos, São Paulo, Brazil. Fax: 16 3371 5365; Tel: 16 3373 9825; E-mail: chu@ifsc.usp.br

<sup>c</sup> Instituto de Física - Universidade de São Paulo, CP 66318, CEP 05315-970 São Paulo, SP, Brazil

<sup>20</sup> <sup>d</sup> Department of Electrical and Computer Engineering - University of Victoria, BC, V8W 3Z8, Victoria, BC, Canada

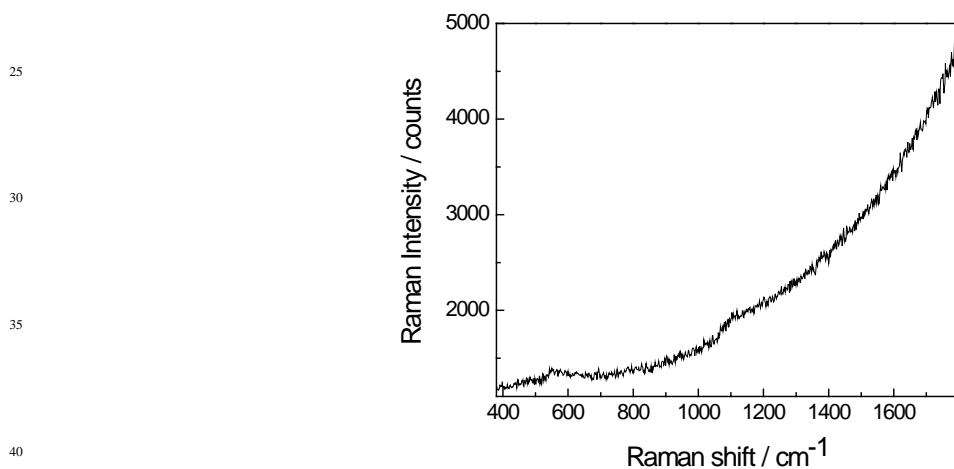

**Fig. S1.** Raman of rhodamine on PMMA in the absence of gold nanoparticles. There is no SERS effect in this case.
